# Supplementary material
Source: publisher site journal article supplement (https://www.dovepress.com/get_supplementary_file.php?f=336680.docx)
Supplement: Supplementary file 1 [file get_supplementary_file.php]

Appendix Table 1: Sporadic community outbreaks in local China after the Wuhan outbreak peak（to be continued)

| City | Region | Date of the first case | Date of no new cases | Facilitator of human needs |
| --- | --- | --- | --- | --- |
| Harbin | Heilongjiang Province | April 9, 2020 | April 28, 2020 | safety needs; belonging needs |
| Shulan | Jilin Province | May 8, 2020 | May 23,2020 | physiological needs;  belonging needs;  safety needs |
| Beijing | Beijing | June11,2020 | July 6, 2020 | safety needs;  Physiological needs;  esteem needs |
| Wulumuqi | Xinjiang Province | July 15, 2020 | Aug 18, 2020 | belonging needs |
| Dalian | Liaoning Province | July 22, 2020 | Aug 6, 2020 | safety needs |
| Kashi | Xinjiang Province | Oct 24, 2020 | Nov 8, 2020 | safety needs;  belonging needs |
| Tianjin | Tianjin | Nov 8, 2020 | Nov 21, 2020 | safety needs;  belonging needs |
| Manzhouli | Inner-mongolia Province | Nov 21,2020 | Dec 10, 2020 | safety needs;  belonging needs |
| Chengdu | Sichuan Province | Dec 7, 2020 | Dec 9, 2020 | belonging needs |
| Beijing | Beijing | Dec 14, 2020 | Jan 30, 2021 | physiological needs  safety needs  belonging needs; self-actualization needs |
| Dalian | Liaoning Province | Dec 15, 2020 | Jan 8, 2021 | safety needs;  physiological needs;  belonging needs |
| Shenyang | Liaoning Province | Dec 23, 2020 | Jan 10, 2021 | safety needs;  belonging needs |
| Shijiazhuang | Hebei Province | Jan 2, 2021 | Feb 7, 2021 | belonging needs;  safety needs |

Appendix Table 2: Sporadic community outbreaks in local China after the Wuhan outbreak peak

| City | Region | Date of the first case | Date of no new cases | Facilitator of human needs |
| --- | --- | --- | --- | --- |
| Suihua (Wangkui) | Heilongjiang Province | Jan 10, 2021 | Feb 9, 2021 | belonging needs |
| Tonghua | Jilin Province | Jan 11, 2021 | Feb 7, 2021 | belonging needs |
| Liu’an | Anhui Province | May 13,2021 | May 30, 2021 | safety needs;  higher-order needs |
| Yingkou | Liaoning Province | May 15,2021 | May 28, 2021 | safety needs;  higher-order needs |
| Guangzhou | Guangdong Province | May 21,2021 | July 19, 2021 | physiological needs; belonging needs; safety needs |
| Nanjing | Jiangsu Province | July 20, 2021 | Aug 12, 2021 | safety needs |
| Yangzhou | Jiangsu Province | July 28, 2021 | Aug 22, 2021 | belonging needs |
| Zhangjiajie | Hunan Province | July 29, 2021 | Aug 19, 2021 | safety needs;  higher-order needs |
| Zhengzhou | Henan Province | July 31, 2021 | Aug 31, 2021 | safety needs |
| Harbin | Heilongjiang Province | Sep 21, 2021 | Oct 12, 2021 | belonging needs |
| Ejina Banner | Inner-mongolia Province | Oct 18, 2021 |  | safety needs;  higher-order needs |
| Shijiazhuang | Hebei Province | Oct 26, 2021 |  | physiological needs; safety needs |
| Dalian | Liaoning Province | Nov 4, 2021 |  | safety needs;  physiological needs;  belonging needs;  self-actualization needs |
